# Supplementary material
Source: HighWire-hosted journal article supplement (http://www.qdcxjkg.com/highwire/filestream/113124/field_highwire_adjunct_files/0/ERJ_10_256.pdf)
Supplement: ERJ_10_256.pdf [file ERJ_10_256.pdf]

## CORRIGENDUM

"Salmeterol in exercise-induced bronchoconstriction in asthmatic children: comparison of two doses" F.M. de Benedictis, G. Tuteri, P. Pazzelli, A. Nicoll, D. Mezzetti, R. Vaccaro. *Eur Respir J.*, 1996; 9: 2099–2103.

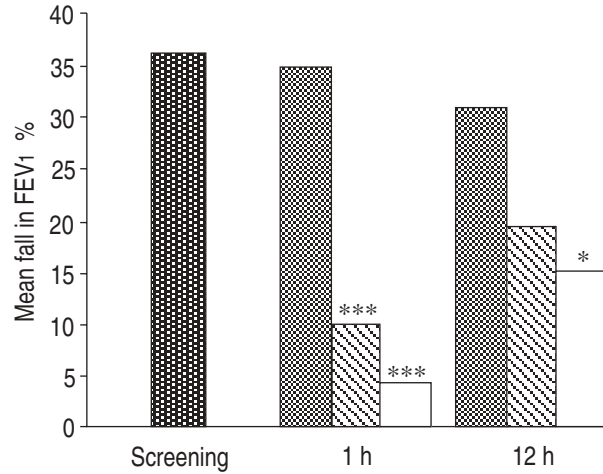

Fig. 1. – Mean percentage decrease in forced expiratory volume in one second (FEV<sub>1</sub>) at screening and after the first and second exercise test with each treatment. : placebo; : salmeterol 25 µg; : salmeterol 50 µg. \*, \*\*\*: p<0.05, <0.001 vs placebo.

Figure 1 was incorrectly printed. The figure is now correctly printed with no significant difference between the 25 µg salmeterol group at 12 h and the placebo group.
